# Supplementary material for: Estrogen and COVID-19 symptoms: Associations in women from the COVID Symptom Study
Source: PLoS One. 2021 Sep 10;16(9):e0257051. doi: 10.1371/journal.pone.0257051 (PMC8432854; doi:10.1371/journal.pone.0257051)
Supplement: S4 Table — (XLSX) [file pone.0257051.s005.xlsx]

## Sheet: Sheet1
Table S4. Decriptives of the 270 female TwinsUK participants in the study.
270 TwinsUK participants who reported app data	Mean age	66.3
	Median age	67
	Mean BMI	26.09
	Median BMI	25.3
	Never smokers	144
	Ex-smokers	96
	Current smokers	30
REPORTED SYMPTOM DATA	Total assessments	270
	Abdominal pain	26
	Chest pain	22
	Delirium	15
	Diarrhoea	26
	Fever	17
	Headache	57
	Hoarse voice	23
	Loss of smell (anosmia)	10
	Persistent cough	21
	Severe fatigue	11
	Severe or significant shortness of breath	3
	Skipped meals	13
	Sore throat	59
	Unusual muscle pains	19
	Hospitalisation	5
	Respiratory support	1
	Predicted COVID-19-positive*	3
*based on the prediction model from Menni et al. (Nat Med. 2020).
